# Supplementary material for: Post-screening characterization of an acidic polysaccharide from Echinacea purpurea with potent anti-inflammatory properties in vivo
Source: Royal Society of Chemistry journal article supplement (doi:10.1039/d0fo01367f), 2020-01-01
Supplement: d0fo01367f1.pdf [file d0fo01367f1.pdf]

1 **Supplementary Information**

2 Post-screening characterization of an acidic polysaccharide from  
3 *Echinacea purpurea* with potent anti-inflammatory properties *in vivo*

4

5 Qiu Li<sup>a</sup>, Fenfang Yang<sup>a</sup>, Ranran Hou<sup>a</sup>, Tingting Huang<sup>a</sup>, Zhihui Hao<sup>b\*</sup>

6

7 <sup>a</sup>College of Chemistry and Pharmaceutical Sciences, Qingdao Agricultural University,  
8 Qingdao 266109, China

9 <sup>b</sup>College of Veterinary Medicine, China Agricultural University, Beijing, China

10

11 **Table S1.** Orthogonal experiment for EPPS extraction by pectinase

| Number         | Enzymolysis<br>temperature (°C) | pH    | Amount of<br>Enzyme (%) | Enzymolysis<br>time (min) | Extraction<br>yield (%) |
|----------------|---------------------------------|-------|-------------------------|---------------------------|-------------------------|
| 1              | 1                               | 1     | 1                       | 1                         | 8.8                     |
| 2              | 1                               | 2     | 2                       | 2                         | 9.19                    |
| 3              | 1                               | 3     | 3                       | 3                         | 9.81                    |
| 4              | 2                               | 1     | 2                       | 3                         | 10.42                   |
| 5              | 2                               | 2     | 3                       | 1                         | 10.38                   |
| 6              | 2                               | 3     | 1                       | 2                         | 9.36                    |
| 7              | 3                               | 1     | 3                       | 2                         | 9.3                     |
| 8              | 3                               | 2     | 1                       | 3                         | 9.81                    |
| 9              | 3                               | 3     | 2                       | 1                         | 9.98                    |
| k <sub>1</sub> | 9.267                           | 9.507 | 9.323                   | 9.720                     |                         |
| k <sub>2</sub> | 10.053                          | 9.793 | 9.863                   | 9.283                     |                         |
| k <sub>3</sub> | 9.697                           | 9.717 | 9.830                   | 10.013                    |                         |
| R              | 0.786                           | 0.286 | 0.540                   | 0.730                     |                         |

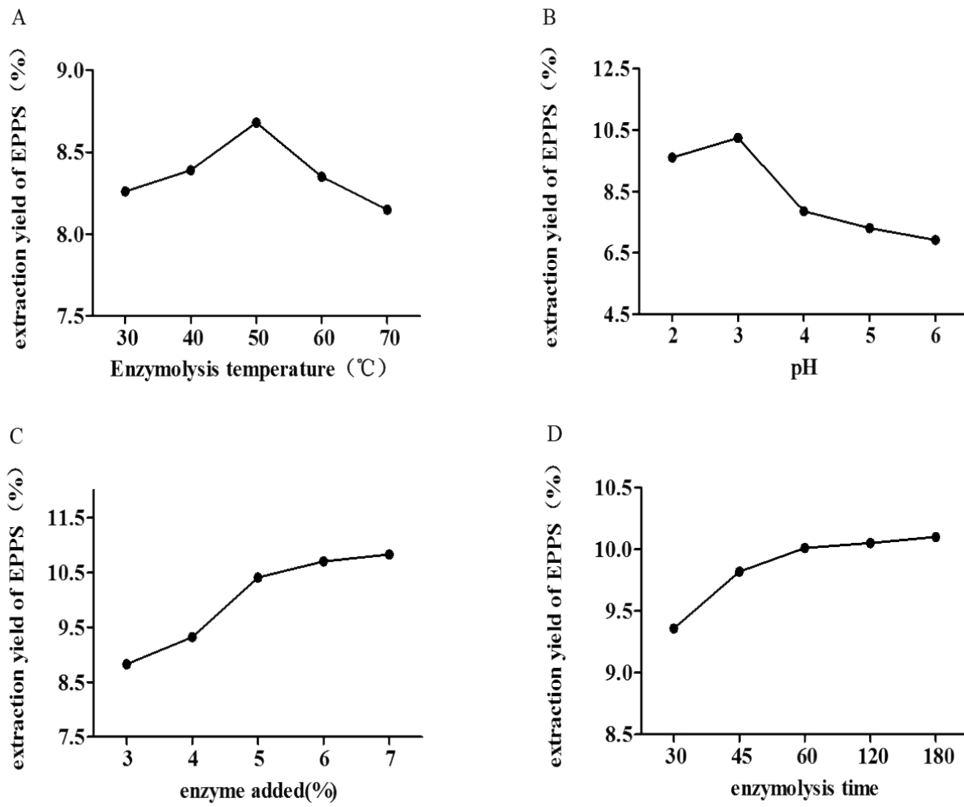

12

13 **Fig. S1.** the effects on extraction yield of EPPS by pectinase. (A) Temperature (B) pH value

14 (C) amount of enzyme (D) enzymolysis time

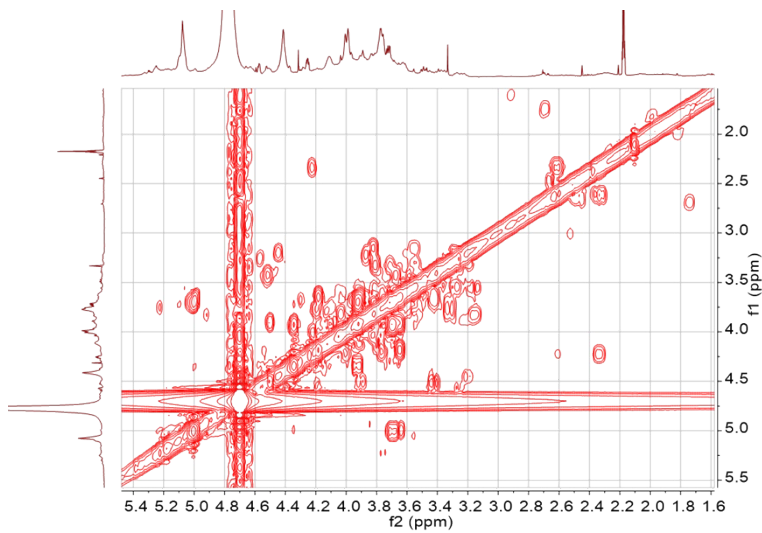

15

16 **Fig. S2.** H-H-COSY spectra of EPPS-3

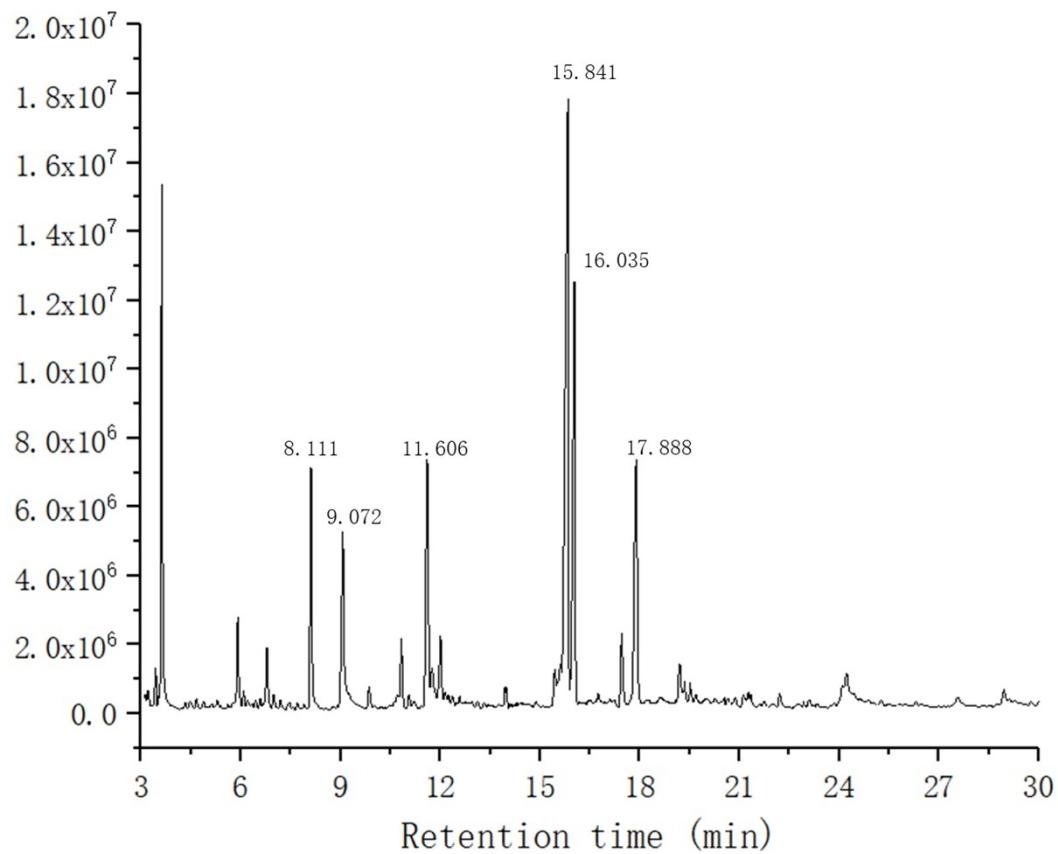

17

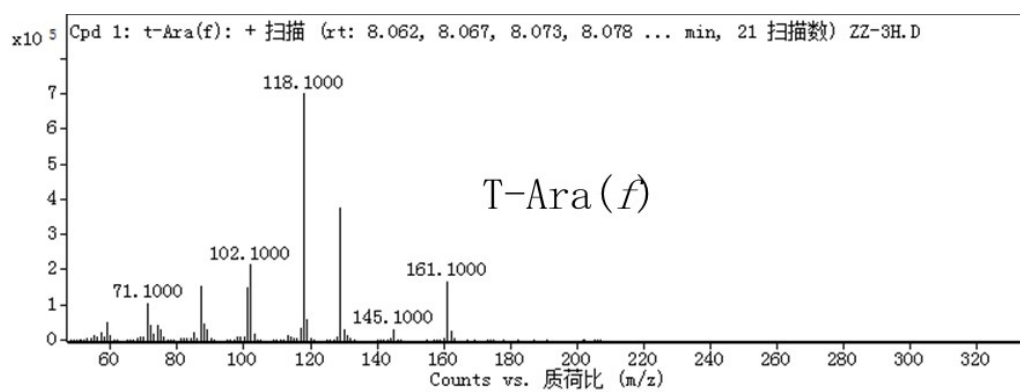

18

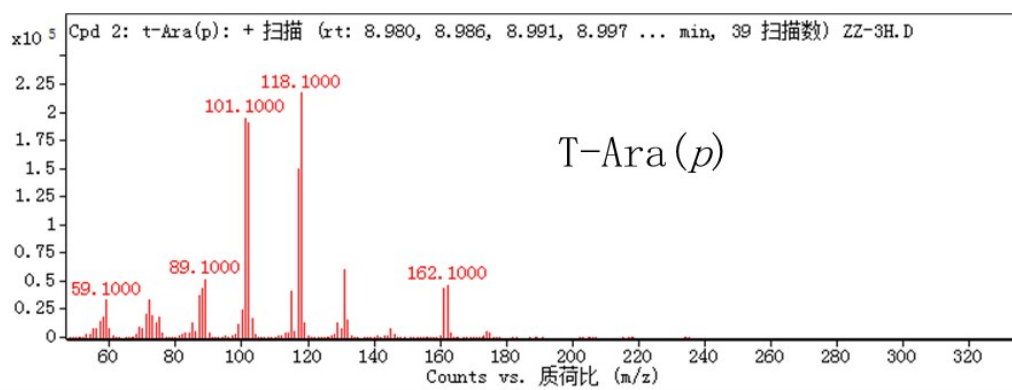

19

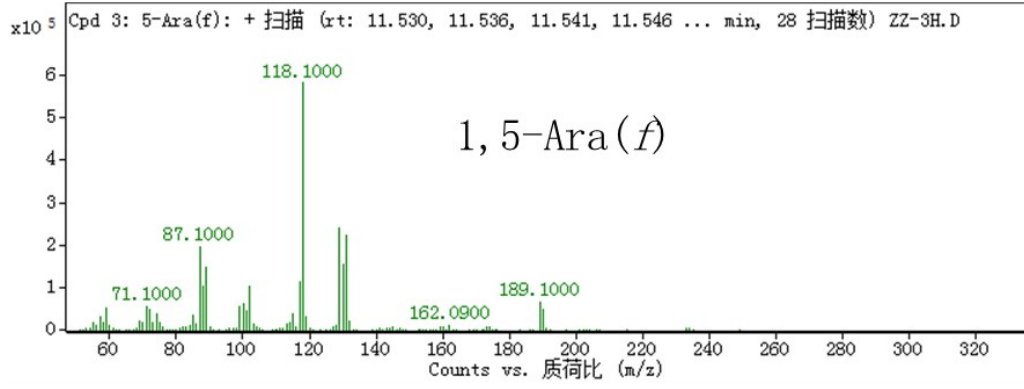

20

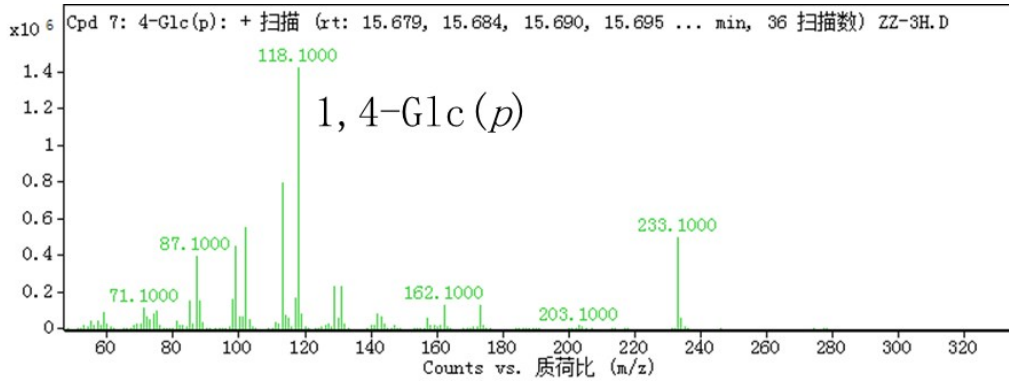

21

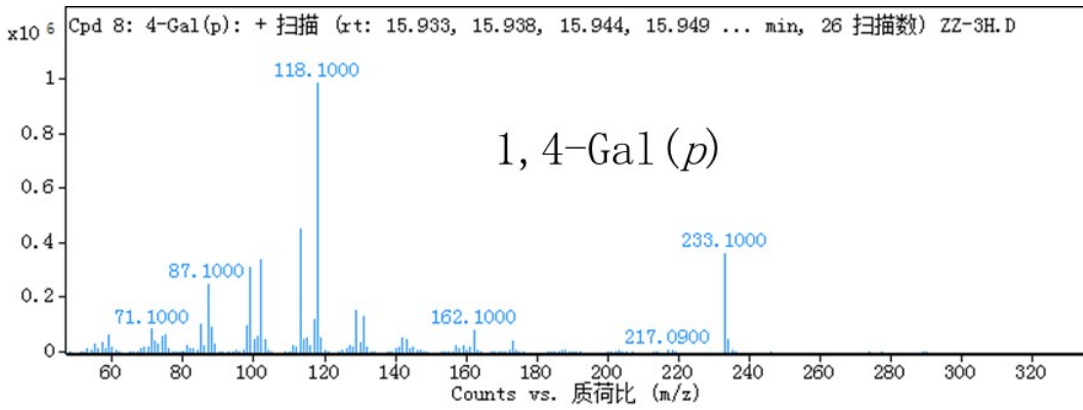

22

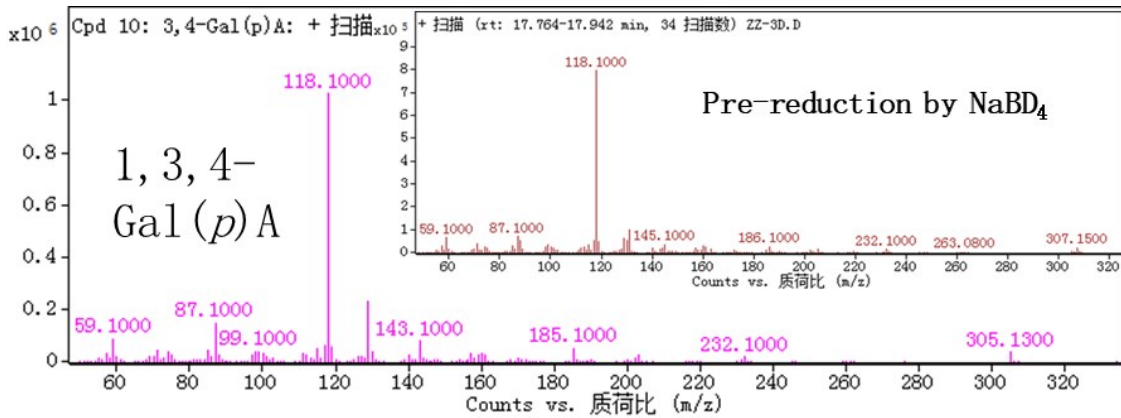

23

24

25 **Fig. S3.** Total ion chromatogram of the derivatives and the mass spectrum of fragments (ZZ-3,  
26 abbreviation in Chinese letter, stands for EPPS-3)
